# Supplementary material for: Molecular insights into the anti-cancer properties of Traditional Tibetan medicine Yukyung Karne
Source: PubMed Central journal article supplement (PMC4197273; doi:10.1186/1472-6882-14-380), 2014-10-07
Supplement: 12906_2014_1952_MOESM1_ESM.pdf [file 12906_2014_1952_MOESM1_ESM.pdf]

## Supplementary Fig.1

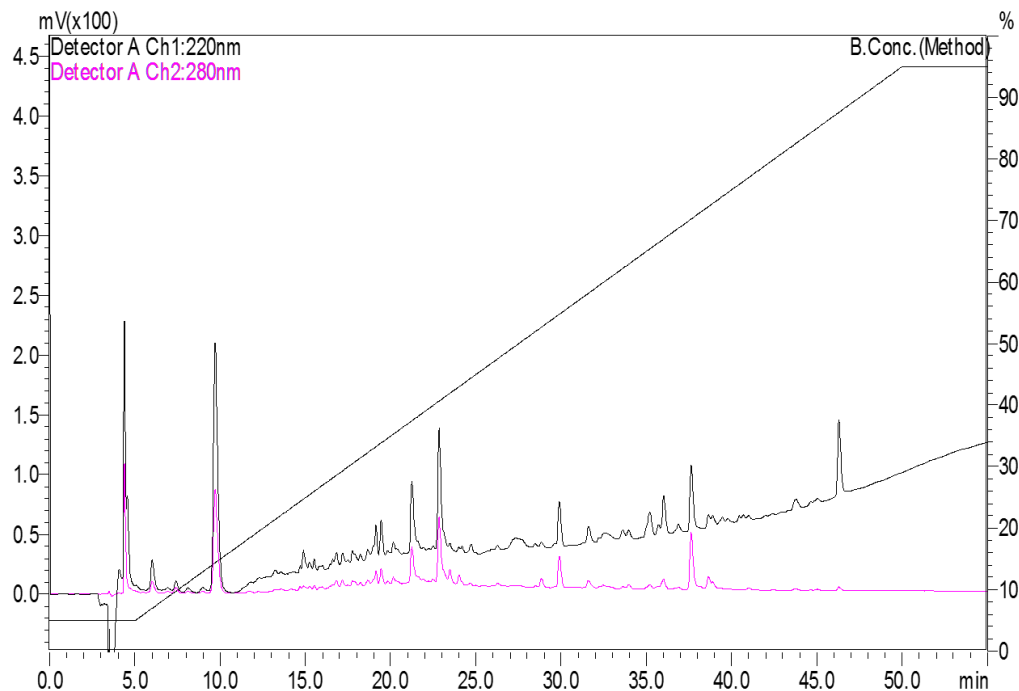

**Supplementary Fig. 1.** Analytical profile of Yukyung Karne (YK). YK sample (300  $\mu$ g in water) was analyzed by reverse phase-HPLC (Shimadzu) on a C18 column using 2% acetonitrile gradient from 5% to 95% over a 55 minute run (flow rate of 1.0ml/min). Sample detection was done at 220 and 280nm under ambient temperature conditions.
